# Supplementary material for: Exploiting Signal Joint T Cell Receptor Excision Circle to Investigate the Impact of COVID-19 and Autoimmune Diseases on Age Prediction and Immunosenescence
Source: MDPI journal article supplement (doi:10.3390/biomedicines10123193), 2022-12-09
Supplement: s1 [file s1]

# Supplementary Material

(Manuscript ID: biomedicines-2061647)

**Table S1. Comparisons of *sjTREC*s dCt levels between RA, SLE and healthy individuals**

| Characteristic |                        | Healthy individuals (no.=85)         |       | RA patients (no.=21)                               |       | SLE (no.=30)                          |       | Test          | P      |
|----------------|------------------------|--------------------------------------|-------|----------------------------------------------------|-------|---------------------------------------|-------|---------------|--------|
|                |                        | No.                                  | %     | No.                                                | %     | No.                                   | %     |               |        |
| Gender         | Females                | 49                                   | 57.65 | 13                                                 | 61.90 | 20                                    | 66.67 | $\chi^2 = 78$ | 0.68   |
|                | Males                  | 36                                   | 42.35 | 8                                                  | 38.10 | 10                                    | 33.33 |               |        |
| Age (years)    | Subadults (<18)        | 25                                   | 29.41 | 0                                                  | 0.00  | 0                                     | 0.00  | FET           | <0.001 |
|                | Young adults (18-34)   | 23                                   | 27.06 | 8                                                  | 38.10 | 21                                    | 70.00 |               |        |
|                | Middle age (35-49)     | 21                                   | 24.71 | 7                                                  | 33.33 | 7                                     | 23.33 |               |        |
|                | Older age (50->60)     | 16                                   | 18.82 | 6                                                  | 28.57 | 2                                     | 6.67  |               |        |
|                | Mean $\pm$ SD<br>Range | 31.79 $\pm$ 18.19<br>3-71            |       | 40.81 $\pm$ 13.86<br>21-70                         |       | 30.93 $\pm$ 9.15<br>19-55             |       | F =<br>2.99   | 0.05   |
| dCt values     | Mean $\pm$ SD<br>Range | -9.62 $\pm$ 2.93<br>(-15.72)-(-3.71) |       | -12.80 $\pm$ 2.54 <sup>a</sup><br>(-18.98)-(-9.21) |       | -10.88 $\pm$ 4.85<br>(-21.84)-(-4.72) |       | F=7.79        | 0.0006 |

$\chi^2$ : Chi-square test; FET: Fisher Exact Test; F: One Way Analysis Of Variance (ANOVA)

P: Probability, statistically significant at P<0.05

a: significant difference compared to healthy individuals

**Table S2. Correlation between dCt levels of *sjTREC*s and the laboratory data / disease duration in autoimmune patients**

|                          | No. | Mean $\pm$ SD<br>Range         | dCt ( $Ct_{TBP} - Ct_{sjTREC}$ ) values |             |
|--------------------------|-----|--------------------------------|-----------------------------------------|-------------|
|                          |     |                                | r                                       | P           |
| ESR                      | 90  | 44.42 $\pm$ 20.54<br>8-90      | -0.12                                   | 0.25        |
| CRP                      | 90  | 25.27 $\pm$ 17.73<br>5-60      | -0.13                                   | 0.23        |
| RF (U/ml)                | 17  | 70.59 $\pm$ 26.37<br>32-120    | -0.14                                   | 0.58        |
| ACPA                     | 19  | 39.6 $\pm$ 35.48<br>0.5-100    | -0.17                                   | 0.47        |
| C3                       | 30  | 86.9 $\pm$ 20.49<br>11-117     | -0.11                                   | 0.56        |
| C4                       | 30  | 11.01 $\pm$ 5.13<br>3-19.2     | -0.09                                   | 0.63        |
| Anti dsDNA               | 30  | 58.85 $\pm$ 20.24<br>12.2-98.2 | <b>-0.37</b>                            | <b>0.04</b> |
| Disease duration (years) | 90  | 4.80 $\pm$ 3.32<br>0.5-16      | -0.15                                   | 0.17        |

r: Pearson correlation coefficient; P: Probability, significant correlations at P<0.05.
